# Supplementary material for: The protein-protein interaction network of eyestalk, Y-organ and hepatopancreas in Chinese mitten crab Eriocheir sinensis
Source: Springer Nature journal article supplement (doi:10.1186/1752-0509-8-39), 2014-03-27

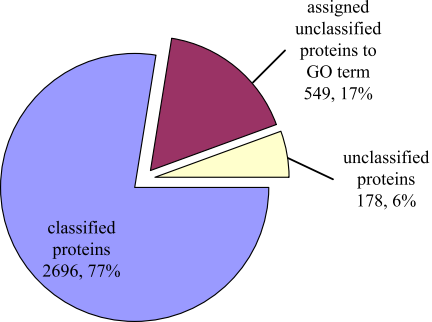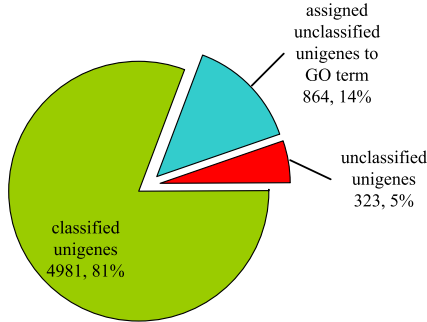

Supplement: 12918_2014_1294_MOESM9_ESM.pdf [file 12918_2014_1294_MOESM9_ESM.pdf]
